# Supplementary material
Source: publisher figshare collection journal article supplement (https://acs.figshare.com/ndownloader/files/9070981)
Supplement: Supplementary file 1 [file 9070981]

**Covalent Synthesis of Two Hybrids Composed of Dawson-type Polyoxometalate and Porphyrin with Remarkable Third-order Optical Nonlinearities Reflecting the Effect of Polyoxometalates**

*Hafiz Muhammad Asif, Yunshan Zhou,\* Lijuan Zhang,\* Nusrat Shaheen, Di Yang, Jiaqi Li and Yi Long, Arshad Iqbal, Yanqin Li.*

State Key Laboratory of Chemical Resource Engineering, Institute of Science, Beijing  
University of Chemical Technology, Beijing 100029, P. R. China

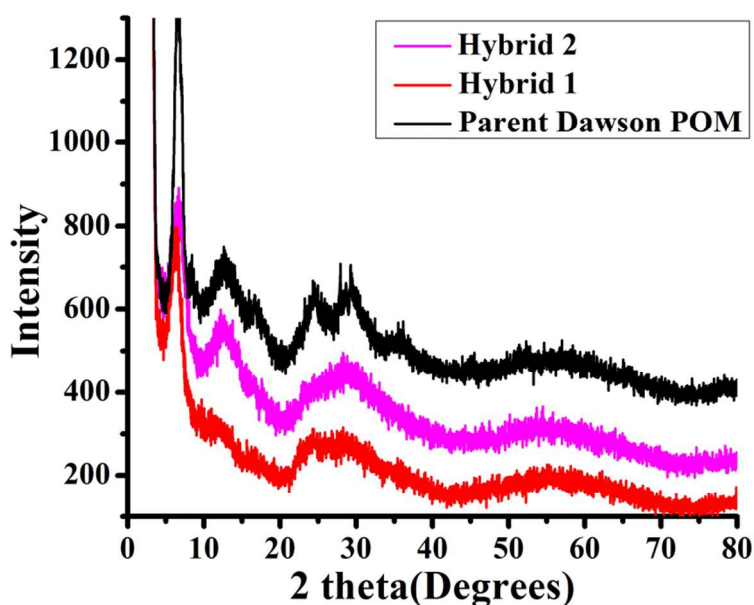

**Figure S1.** Powder XRD pattern of hybrids 1 and 2 with parent Dawson POM.

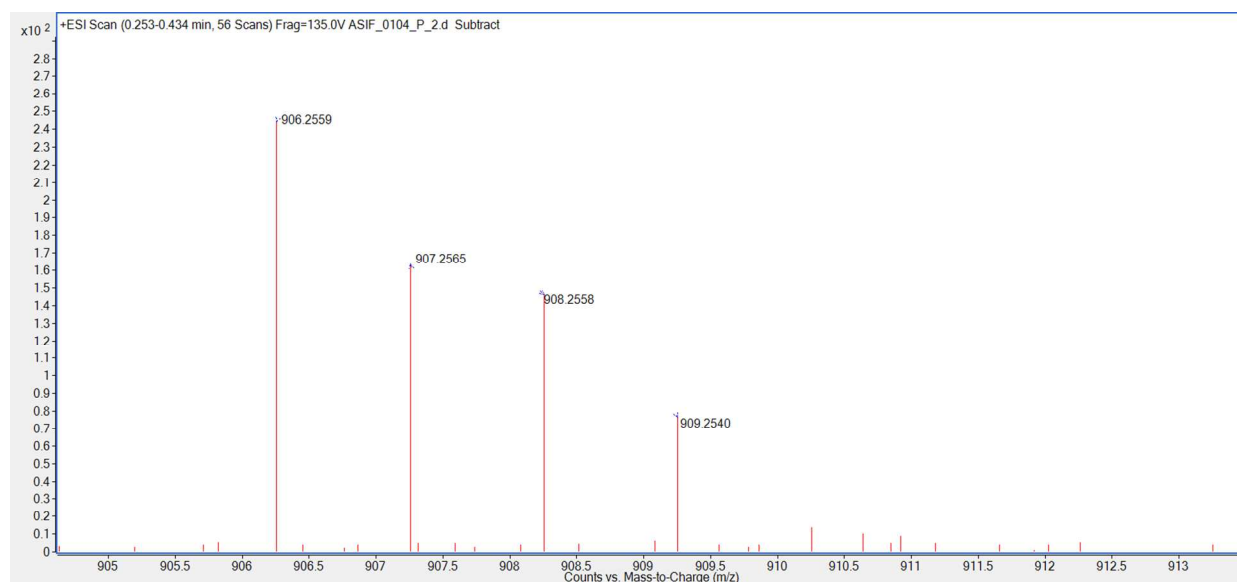

(a)

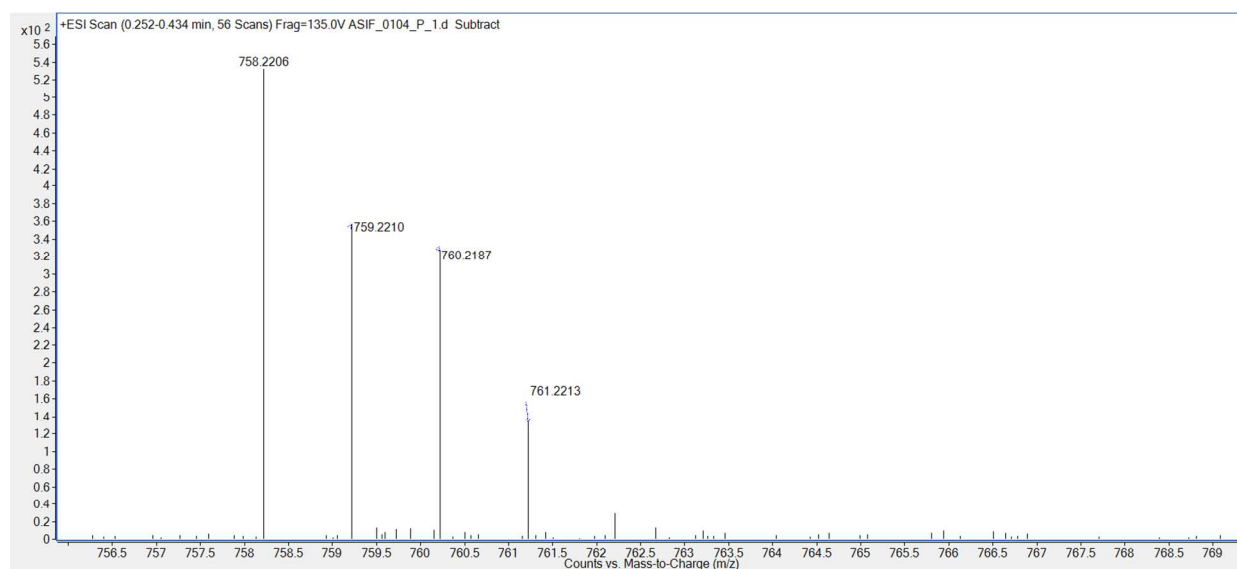

(b)

**Figure S2.** ESI-MS spectra of TPP-di-Tris (a) and TPP-Tris (b).

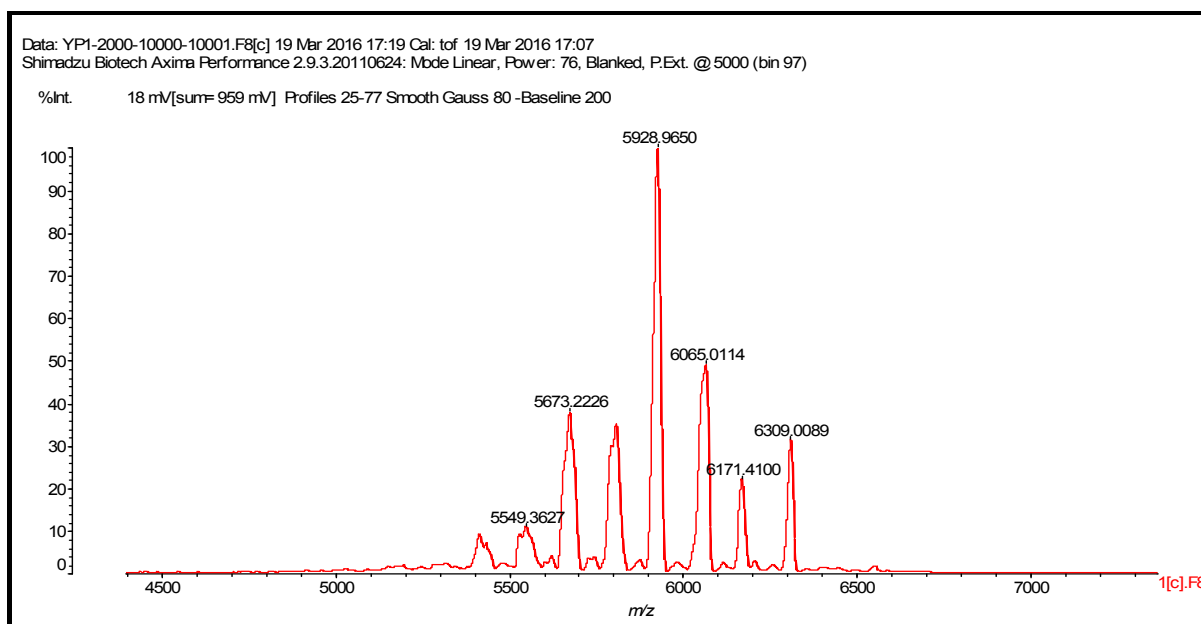

(a)

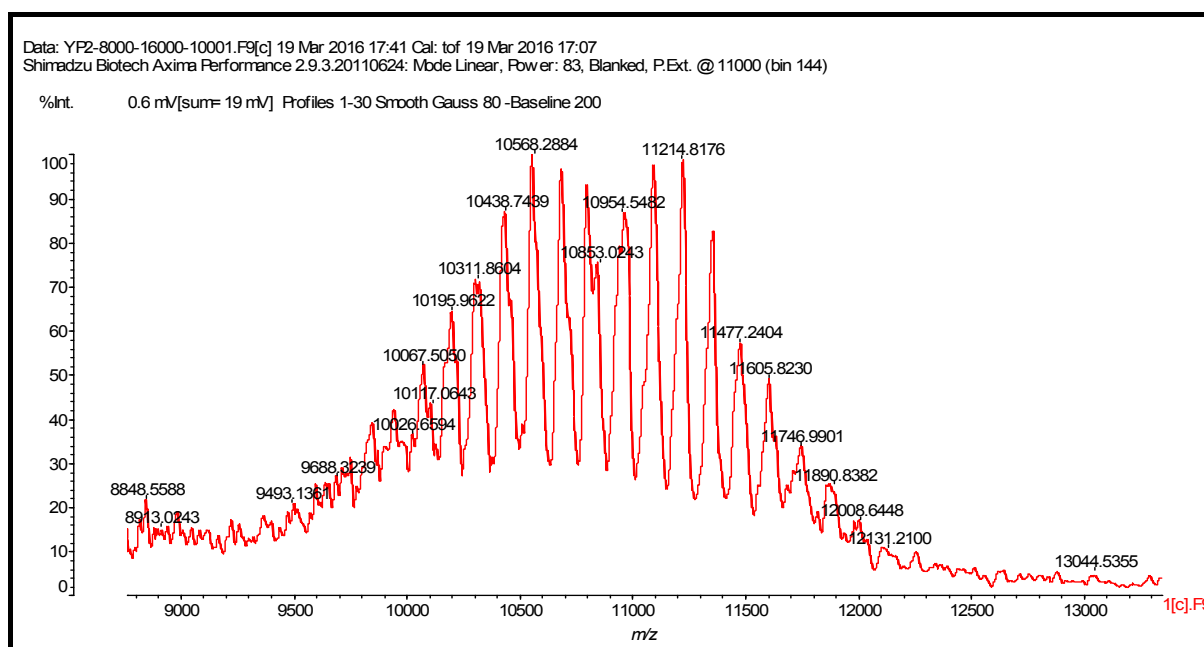

(b)

**Figure S3.** MALDI-TOF-MS spectra of hybrid **1** (a) and hybrid **2** (b).

**Synthesis of TPP-Tris:** TPP-Tris was prepared as previously reported<sup>1-2</sup> but with a minor modification. In detail, 5,10,15-(4-phenyl)-20-(4-carboxymethylphenyl)porphyrin<sup>3</sup> (1mmol), K<sub>2</sub>CO<sub>3</sub> (0.083 g, 1 mmol ) and Tris-hydroxylaminomethane (1mmol) were introduced in a 2 ml

flask. DMSO (2 mL, dried on molecular sieves) was added and the mixture was protected from light and stirred for 17h under Nitrogen at 85 °C. The mixture was poured in cold distilled water (100 mL), the resulting precipitate was collected by simple filtration, adsorbed on silica gel and purified by flash chromatography, elution with a gradient from chloroform + methanol (4:2) to yield the expected product as a violet powder (0.295 g, 50 % yield). Elemental analysis (%) calcd. for:  $C_{49}H_{39}N_5O_4 \cdot MeOH$ : C 67.23, H 5.08, N 7.84; found: C 67.53, H 5.15, N 4.73 N 7.76. (ESI-MS)  $m/z$  762.6 (M+1)<sup>+</sup>. <sup>1</sup>H NMR (400 MHz; DMSO-d<sub>6</sub>):  $\delta$  = 8.84 – 7.83 [All phenyl + pyrrole 'H'], 7.69 (s, 1H, 2NH), 4.90 (s, 3H, OH), 3.85 (s, 6H, CH<sub>2</sub>), -2.91 (s, 2H, -NH). FT-IR (KBr):  $\nu_{max}$  = 3324 ( $\nu_{O-H}$ , m, br), 2946, 2894 ( $\nu_{C-H}$ , w), 2324 (w), 1722 (w), 1644 ( $\nu_{C=O}$ , vs) 1597 (m), 1531 (s), 1498 (m), 1470 ( $\nu_{C-H}$ , sh), 1400 (sh), 1348 (m), 1320 (br), 1229 (w), 1198 (m), 1156 (w), 1105 (m), 1052 (s), 960 (sh) 886 (m), 870 (sh), 804 (vs), 758 (m), 737 (s), 668 (w), 567 (m)  $cm^{-1}$ . UV–vis spectrum ( $\lambda_{max}$  (nm) in DMF/CH<sub>3</sub>CN: 415, 512, 548, 589, and 645.

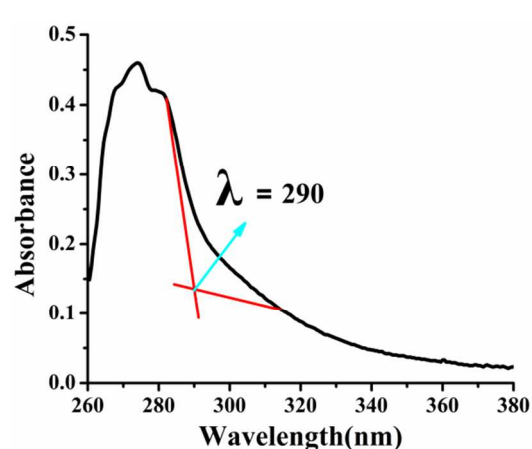

(a)

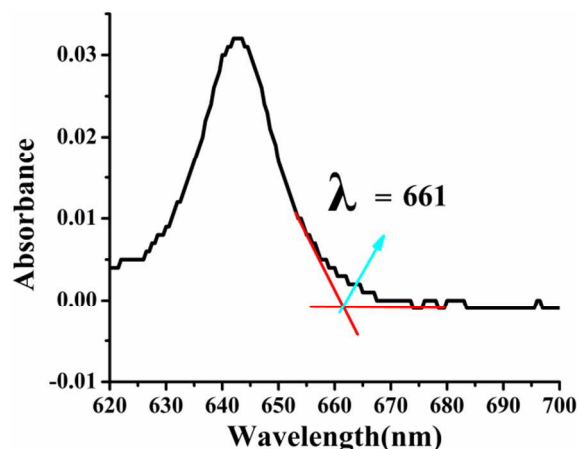

(b)

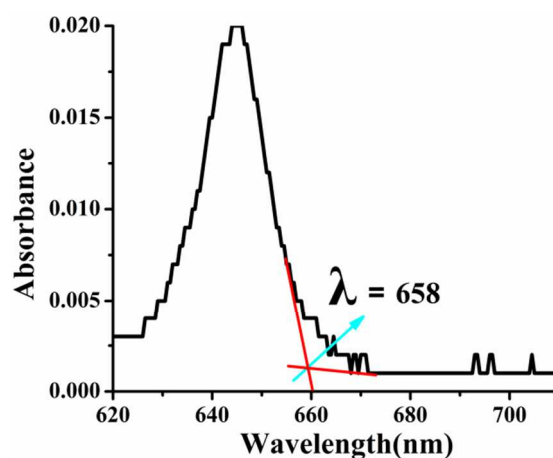

(c)

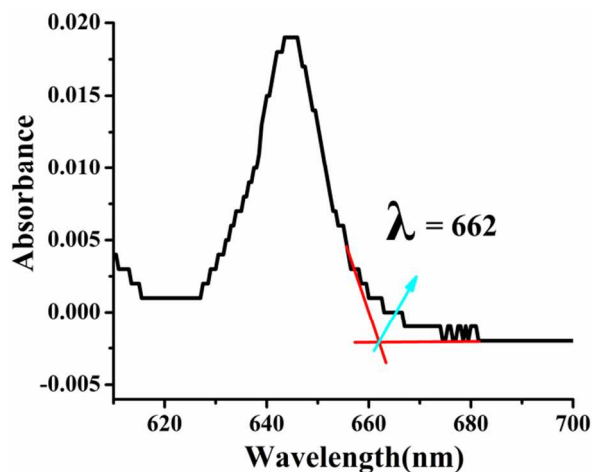

(d)

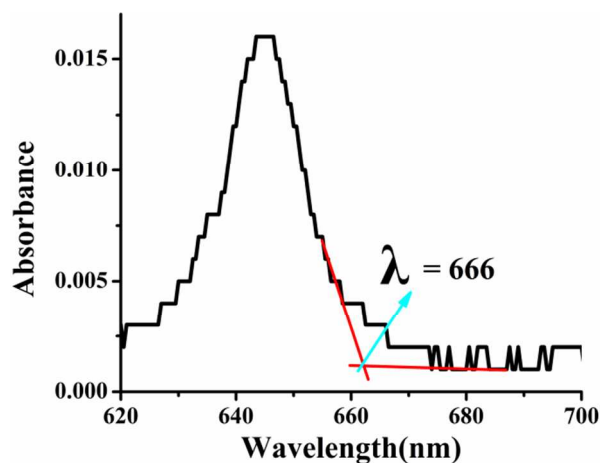

(e)

**Figure S4.** UV-vis. spectra of Dawson POM (a), TPP-di-Tris (b), TPP-Tris (c), Hybrid **1** (d), Hybrid **2** (e) in DMF/CH<sub>3</sub>CN (all the compounds have the concentration of  $5.32 \times 10^{-5}$  M, highlighting the absorption edges corresponding to the HOMO-LUMO gap  $E_g$  values of the compounds, respectively.

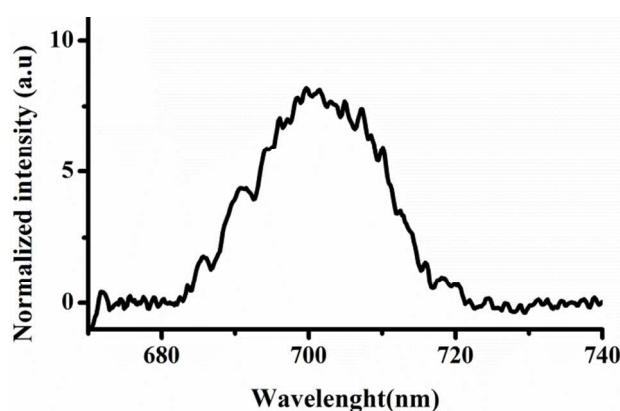

(a)

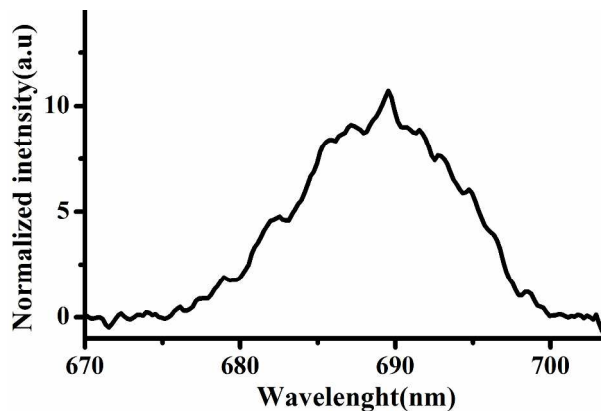

(b)

**Figure S5.** Phosphorescence spectra of  $10^{-5}$  M solutions of hybrid **1** (a) and hybrid **2** (b) in DMF/CH<sub>3</sub>CN (v/v = 1:1) at the excitation wavelength  $\lambda_{\text{exc}} = 331$  and 328 nm respectively.

**Calculation of the estimated energy level of the singlet excited state, triplet excited states, and charge-separated state**

According to the formula  $E(\text{singlet}) = (1240/\lambda(\text{lowest Q}) - 1240/\lambda(\text{fluorescence}))/2$  (eV), the energy levels of singlet excited states of all hybrids and porphyrin molecules are calculated:

$E(\text{singlet})$  for TPP-di-Tris =  $((1240/661) - (1240/649))/2$  (eV) = -0.020 eV

$E(\text{singlet})$  for TPP-Tris =  $((1240/658) - (1240/648))/2$  (eV) = -0.016 eV

$E(\text{singlet})$  for Hybrid **1** =  $((1240/662) - (1240/651))/2$  (eV) = -0.015 eV

$E(\text{singlet})$  for Hybrid **2** =  $((1240/666) - (1240/649))/2$  (eV) = -0.025 eV

According to the formula  $E(\text{triplet}) = (1240/\lambda(\text{lowest } Q) - 1240/\lambda(\text{phosphorescence}))/2$  (eV), the energy levels of triplet excited states of hybrids **1** and **2** are calculated:

$E(\text{triplet})$  for Hybrid **1** =  $((1240/662) - (1240/699))/2$  (eV) = -0.04 eV

$E(\text{triplet})$  for Hybrid **2** =  $((1240/666) - (1240/690))/2$  (eV) = -0.03 eV

According to the formula  $E(\text{CS}) = E(\text{ox of por}) - E(\text{red of POM})$  (eV), the energy levels of the charge separated states for hybrids **1** and **2** are determined:

$E(\text{CS})$  for Hybrid **1** =  $[0.79 - (-0.87)]\text{V} = 1.64 \text{ V} = -1.64$  (ev)

$E(\text{CS})$  for Hybrid **2** =  $[0.77 - (-0.87)]\text{V} = 1.66 \text{ V} = -1.66$  (ev)

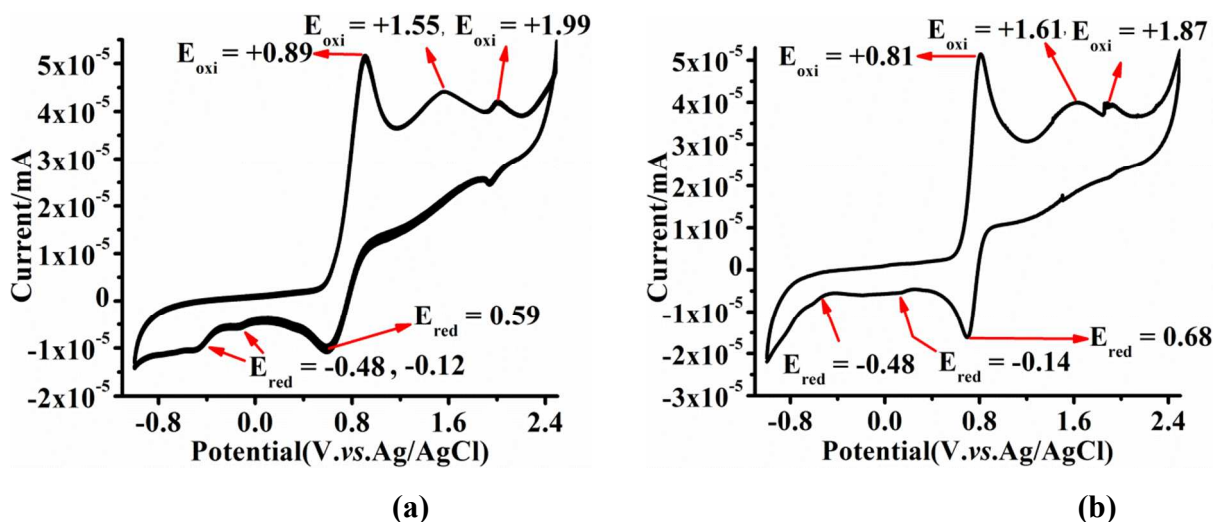

**Figure S6.** Cyclic voltammograms of hybrid **1** (a) and hybrid **2** (b) in DMF/CH<sub>3</sub>CN (v/v = 1:1) (all the compounds have the concentrations of 1 mM in the presence of 0.1 M (*n*-Bu<sub>4</sub>N)PF<sub>6</sub> as a supporting electrolyte.

It is found that in cyclic voltammograms of hybrid **1** and hybrid **2** the first two peaks are oxidation peaks of porphyrin molecular moiety and reduction occurs at [-0.48, -0.12] V and [-0.48, -0.14] V for vanadium and tungsten present in hybrids **1** and **2** respectively, while potentials are somewhat shifted (Figure S6) (Hou, Y.; Hill, C. L., Hydrolytically Stable Organic Triester Capped Polyoxometalates with Catalytic Oxygenation Activity of Formula [RC(CH<sub>2</sub>O)

$_{3}\text{V}_3\text{P}_2\text{W}_{15}\text{O}_{59}]^{6-}$  (R = CH<sub>3</sub>, NO<sub>2</sub>, CH<sub>2</sub>OH). *Journal of the American Chemical Society* **1993**, *115*, 11823-11830; Zonoz, F. M.; Aliabadi, F., A New Sandwich-Type Polyoxometalates Containing Mixed Transition Metals,  $[\text{Cd}_2\text{Zn}_2(\text{H}_2\text{O})_2(\text{P}_2\text{W}_{15}\text{O}_{56})_2]^{16-}$ : Syntheses, Spectrochemical Characterization and Its Electrocatalytical Activity Comparison with  $[\text{M}_4(\text{H}_2\text{O})_2(\text{P}_2\text{W}_{15}\text{O}_{56})_2]^{16-}$  (M= Cd<sup>2+</sup> and Zn<sup>2+</sup>) and  $[\text{P}_2\text{W}_{15}\text{O}_{56}]^{12-}$ . *Inorganica Chimica Acta* **2016**, *444*, 87-94.).

### Primary equations used to find the important parameters of third-order nonlinear optical properties.

Refractive index  $n_2$  (esu), the nonlinear absorption coefficient  $\beta$  (esu) and the third-order optical nonlinear susceptibility  $\chi^{(3)}$  (esu) are evaluated by the following formulae.<sup>4</sup>

$$\Delta T_{P-V} = 0.406(1-S)^{0.25}|\Delta\varphi_0|, \quad (\text{Equation S1})$$

$$\Delta\varphi_0 = kL_{\text{eff}}\gamma I_0, \quad (\text{Equation S2})$$

$$L_{\text{eff}} = (1 - e^{-\alpha_0 L})/\alpha_0, \quad (\text{Equation S3})$$

$$n_2(\text{esu}) = \frac{cn_0}{40\pi} \gamma (\text{m}^2/\text{W}), \quad (\text{Equation S4})$$

Where,  $\Delta T_{P-V}$  is called as Normalized peak-valley difference, The symbol  $\Delta\varphi_0$  is used for phase shift of the beam at the focus,  $K = 2\pi/\lambda$  is named as wave vector,  $I_0$  (unit: W/m<sup>2</sup>) is used to describe the intensity of the light at focus point,  $L_{\text{eff}}$  is used to represent the effective length of the sample measured in terms of the linear-absorption coefficient  $\alpha_0$  and the true optical path length through the sample,  $n_0$  indicates the linear refractive index, and  $\gamma$  is called as optical Kerr constant. The conversion can be realized between  $n_2$  (esu) and  $\gamma$  (m<sup>2</sup>/W) by equation (S4).

Normalized transmittance  $T(z, s = 1)$  can be expressed as

$$T(z, s = 1) = \sum_{m=0}^{\infty} \frac{[q_0(z)]^m}{(m+1)^{3/2}}, \quad (\text{Equation S5})$$

When sample is measured under open aperture.

Where,  $q_0(z) = \beta I_0 L_{\text{eff}} / (1 + z^2/z_0^2)$ ,  $\beta$  is nonlinear absorption coefficient.

( $\beta$ ) Which is called as nonlinear absorption coefficient is determined by above given equation 5.

Very important parameters like third-order optical nonlinear susceptibility  $\text{Im}\chi^{(3)}$ ,  $\text{Re}\chi^{(3)}$  and  $\chi^{(3)}$  are calculated by using the following equations (S6-S8)

$$\text{Im}\chi^{(3)}(\text{esu}) = (n_0^2 c^2 / 240 \pi^2 \omega) \beta(\text{m/W}) = 100 \lambda n_0 \beta(\text{esu}) / 6 \pi^2 \quad (\text{Equation S6})$$

$$\text{Re}\chi^{(3)}(\text{esu}) = n_0^2 c \gamma(\text{m}^2/\text{W}) / 120 \pi^2 = n_0 n_2(\text{esu}) / 3 \pi \quad (\text{Equation S7})$$

$$\chi^{(3)} = \sqrt{\left( \frac{c n_0}{160 \pi^2} \gamma \right)^2 + \left( \frac{c \beta n_0^3 \lambda}{64 \pi^3} \right)^2}, \quad (\text{Equation S8})$$

Equation S9<sup>5</sup> is the source to find out the molecular second hyperpolarizability  $\gamma$  of the samples

$$\gamma = \frac{\chi^{(3)}}{N_c L}. \quad (\text{Equation S9})$$

where given symbols are used to denote the following parameters.

$n_0$  = Linear refractive index of sample.

$N_c$  = Molecular number density per cubic centimeter.

$L$  = Local-field correction factor, which may be approximated by  $[(n_0^2 + 2)/3]^4$ .<sup>5</sup>

## References

1. Hassan, S. U; Asif, H. M.; Zhou, Y.; Zhang, L.; Qu, N.; Li, J.; Shi, Z. "Closer Is Better and Two Is Superior to One": Third-Order Optical Nonlinearities of a Family of Porphyrin–Anderson Type Polyoxometalate Hybrid Compounds. *J. Phys. Chem. C*. **2016**. DOI: 10.1021/acs.jpcc.6b09951.
2. Allain, C.; Schaming, D.; Karakostas, N.; Erard, M.; Gisselbrecht, J.-P.; Sorgues, S.; Lampre, I.; Ruhlmann, L.; Hasenknopf, B. Synthesis, Electrochemical and Photophysical Properties of Covalently Linked Porphyrin–Polyoxometalates. *Dalton Trans.* **2013**, 42, 2745-2754.
3. Lindsey, J. S.; Schreiman, I. C.; Hsu, H. C.; Kearney, P. C.; Marguerettaz, A. M., Rothmund and Adler-Longo Reactions Revisited: Synthesis of Tetraphenylporphyrins under Equilibrium Conditions. *J. Org. Chem.* **1987**, 52, 827-836.
4. Sheik-Bahae, M.; Said, A. A.; Wei, T.-H.; Hagan, D. J.; Van Stryland, E. W. Sensitive Measurement of Optical Nonlinearities Using a Single Beam. *IEEE Journal of Quantum Electronics*. **1990**, 26, 760-769.
5. Wang, S.; Huang, W.; Zhang, T.; Yang, H.; Gong, Q.; Okuma, Y.; Horikiri, M.; Miura, Y. F. Third-Order Nonlinear Optical Properties of Didodecyldimethylammonium-Au (dmit)~ 2. *Appl. Phys. Lett.* **1999**, 75.
